# Supplementary material for: Ecological Study of Aquaponics Bacterial Microbiota over the Course of a Lettuce Growth Cycle
Source: MDPI journal article supplement (doi:10.3390/w13152089), 2021-07-30
Supplement: s1 [file s1]

Archive with 1 entries (1 files):
- water-1292463-supplementary.pdf
